# Supplementary material for: Sevoflurane depletes macrophages from the melanoma microenvironment
Source: PLoS One. 2020 May 29;15(5):e0233789. doi: 10.1371/journal.pone.0233789 (PMC7259700; doi:10.1371/journal.pone.0233789)
Supplement: S1 Raw Data — (XLSX) [file pone.0233789.s008.xlsx]

## Sheet: Figure 1
FIG 1B	SEVO								CTRL
Tumor volume	1	2	3	4	5	6	7	8	1	2	3	4	5	6	7	8
Day 1	266.805	275.2	126	274.36	75.625	56	81.25	120.213	147	182.52	95.7275	224	166.464	95.648	174.375	70.225
Day 3	451.25	600	343.188	1105.92	144	525	196.875	183.75	388.8	684	423.405	420	310.675	231.04	285.77	126.75
Day 5	1351.37	1282.53	1087.87	15.975	486.68	361.25	450	713.168	610	990.584	914.062	612.521	541.5	186.2	530.45	415.15
Day 7	2018.1	2384.25	1310.66	2649.45	1176.26	771.75	1014	1482.62	1135.13	1717.79	1595.37	1062.86	725	319.39	845.64	806.45
Day 9			2081.25			1673.61	1294.34	3009.98	1856.25			2230.74	1281.6	678.976	1080	2095.25
Day 11														1152
									M1		M2		Mixed
FIG 1C	SEVO	CTRL		FIG 1D	SEVO	CTRL		FIG 1E	SEVO	CTRL	SEVO	CTRL	SEVO	CTRL		FIG 1F	SEVO	CTRL
Leukocytes	1.84	1.5		TAM	0.3	0.2		M1/M2 TAM	4.61	9.01	43.91	29.4	46.55	57.5		PD-L1 TAM	69.14	72.71
	1.91	1.24			0.33	0.18			6.13	10.08	26.2	34.33	65.9	49.86			67.48	60.37
	1.2	2.38			0.22	0.2			8.64	5.24	25.45	27.93	61.59	61.85			65.18	72.84
	0.54	2.27			0.11	0.38			8.77	5.54	30.26	48.15	55.26	40.77			66.53	76.15
	2.02	1.38			0.35	0.24			2.83	6.67	30.45	19.58	65.02	70.83			73.43	81.87
	2.83	4.02			0.45	0.82			4.46	4.07	35.27	34.97	57.37	59.44			70.24	74.38
	3.12	1.91			0.21	0.4			7.82	4.74	18.4	33.5	67.7	59.2			67.88	77.35
	1.67	1.15			0.3	0.13			3.87	5.6	42.52	56.4	49.92	30			71.98	66.22
FIG 1G	SEVO	CTRL		FIG 1H	SEVO	CTRL		FIG 1I	SEVO	CTRL		FIG 1J	SEVO	CTRL		FIG 1K	SEVO	CTRL
PD-1 TAM	37.22	19.38		TAN	0.72	0.61		MFI PD-L1	10136	21573		MFI PD-1	2038	1887		PD-1 PD-L1	23.58	4.58
	51.6	36.48			0.43	0.53			15618	5675			2341	2852			10.1	13.9
	34.82	14.03			0.4	1.33			25939	25935			2254	1511			33.57	0.72
	35.54	26.28			0.22	0.83			28275	17162			2550	2223			16.12	6.63
	46.57	49.69			0.81	0.59			12662	24591			2646	2862			12.2	22
	41	20.05			1.19	1.08			16558	12856			2287	1405			15.54	21.4
	29.64	27.11			0.91	0.51			9911	23884			1672	2090			4.53	17.9
	48.99	16			0.75	0.5			15564	8627			2584	1607			15.9	4

## Sheet: Figure 3
FIG 1B	SEVO							INJ
Tumor volume	1	2	3	4	5	6	7	1	2	3	4	5	6	7
Day 1	147.875	380.7	157.113	104.4	324	73.008	397.375	416	487.688	364.5	45.5625	144	13.5	87.5
Day 3	405	1098.5	639.45	182.812	383.562	364.5	583.495	925.75	448	802.75	320	266.805	752.64
Day 5	535	2456.5	1080	976.562	664.062	828	726	1091.06	537.92	1975.68	405	625	1093.75	361
Day 7	650		1568	976.562	703.125	1230.19	1112.9			1597.7	1174.55	1321.31	1519	482.23
Day 9	1380.69			1700.35		2245.81	1892.25				1665	2442.11
Day 11	1568
									M1		M2		Mixed
FIG 1C	SEVO	INJ		FIG 1D	SEVO	INJ		FIG 1E	SEVO	INJ	SEVO	INJ	SEVO	INJ		FIG 1F	SEVO	INJ
Leukocytes	1.11	2.79		TAM	0.45	0.94		M1/M2 TAM	24.94	33.61	8.76	21.29	64.08	40.48		PD-L1 TAM	61.35	46.52
	2.69	2			0.46	2.76			12.59	7.46	32.29	37.18	52.3	52.66			42.16	56.8
	1.04	4.02			0.35	1.27			37.34	13.64	23.2	32.63	24.3	45.4			56.09	52.5
	1.12	3.88			0.19	3.96			6.86	39.76	52.24	21.89	35.36	34.5			53.66	23.61
	1.43	1.67			0.46	0.95			23.85	7.78	26.4	50.56	45	35.56			51.71	41.33
	0.68	2.57			0.09	1.6			4.6	23.66	56.32	26.64	29.89	42.9			61.54	36.55
	2.02	2.32			0.3	2.82			18.51	42.51	28.6	10.54	50.41	43.55			50.09	45.61
FIG 1G	SEVO	INJ		FIG 1H	SEVO	INJ		FIG 1I	SEVO	INJ		FIG 1J	SEVO	INJ		FIG 1K	SEVO	INJ
PD-1 TAM	3.49	17.69		TAN	0.7	5.22		MFI PD-L1	8298	2706		MFI PD-1	967	1498		PD-1 PD-L1	0.74	24.06
	15.92	26.82			1.77	1.93			2473	5002			1708	1863			12.8	33.13
	16.41	8.53			3.12	1.45			6936	6783			1416	1991			22.66	15.23
	12.68	5.45			4.11	1.32			4998	1025			1411	1549			10.57	4.23
	18.38	14.13			5.28	2.39			13099	6694			1399	1176			7.41	4.53
	13.46	27			2.22	0.5			10095	905			1310	1823			9.62	16.59
	7.13	22.04			3.15	1.35			4104	3511			1350	1267			6.43	14.5

## Sheet: Figure 4
FIG 1B	SEVO							INJ
Tumor volume	1	2	3	4	5	6	7	1	2	3	4	5	6	7
Day 1	364.366	176.4	523.688	90.75	40	196	307.062	1009.49	257.25	213.75	105.625	605	192	207.36
Day 3	698.4	510	651.219	153	144	361.25	392.85	1982.06	1918.44	372.6	245.426	1015.62	243	225
Day 5	1261.31	535	1225.25	625	245	771.75	877.25			1134.67	552.23	2032.06	513.337	1905.75
Day 7		1800	1912.5	625	496.375	1682	2112				1140.75		737.28
Day 9				859.625	1029.6						2268.65		819.2
Day 11				1743.75	1490.35								1441.5
									M1		M2		Mixed
FIG 1C	SEVO	INJ		FIG 1D	SEVO	INJ		FIG 1E	SEVO	INJ	SEVO	INJ	SEVO	INJ		FIG 1F	SEVO	INJ
Leukocytes	1.63	4.66		TAM	0.23	0.95		M1/M2 TAM	41.05	13.81	22.7	20.97	31.2	62.97		PD-L1 TAM	59.86	56.85
	1.82	2.74			0.94	1.21			9.6	18.87	20.31	40.63	53.87	38.44			71.47	48.1
	4.33	2.92			1.04	1.13			21.62	14.5	7.43	43.77	69.42	39.6			83.23	55.06
	1.61	3.57			0.34	1.38			6.41	12.02	26.24	22.41	65.45	64.16			77.35	71.13
	2.45	4.86			0.8	1.98			11.14	28.64	13.78	30.12	71.87	38.49			91.44	59.41
	3.02	1.78			0.51	0.28			14.08	12.37	8.64	17.38	76.7	67.2			85.99	76.65
	1.9	3.71			0.54	1.28			25.92	32.01	11.81	11.49	60.79	55.12			82.74	48.09
FIG 1G	SEVO	INJ		FIG 1H	SEVO	INJ		FIG 1I	SEVO	INJ		FIG 1J	SEVO	INJ		FIG 1K	SEVO	INJ
	23.88	12.08		TAN	0.72	0.71		MFI PD-L1	5903	7684		MFI PD-1	1748	1574		PD-1 PD-L1	9	4.61
	7.4	12.43			0.36	0.57			35537	4059			1146	1488			5.62	20.87
	47.91	34.02			1.68	0.78			33978	6427			2434	2130			38.9	16.18
	24.6	22.5			0.37	1.18			20789	16891			1566	1512			12.24	12.05
	59.23	4.74			0.39	1.17			43628	7750			2539	1232			53.51	0.95
	67.39	57.27			0.34	0.42			43426	17070			3084	2468			55.71	16.89
	64.25	45.94			0.47	0.68			42332	3747			2829	1941			47.64	20.56

## Sheet: S Fig 3
Priming
S FIG 1A	SEVO									CTRL
	1	2	3	4	5	6	7	8	9	1	2	3	4	5	6	7	8	9
Day 0	100	100	100	100	100	100	100	100	100	100	100	100	100	100	100	100	100	100
Day 2	103.98	103.45	105.35	101.75	104.88	102.81	100.43	104.35	102.61	103.56	104.41	102.71	102.85	103.23	103.35	102.13	102.13	107.66
Day 4	104.78	104.21	107.41	102.63	104.07	98.39	99.57	102.37	103.48	104.89	106.17	101.36	104.07	103.23	102.23	102.13	102.13	108.51
Day 6	107.17	105.36	106.58	103.95	104.88	100.4	97.87	97.63	105.22	101.33	104.41	102.26	102.85	104.03	104.46	101.7	102.55	111.06
Day 8	108.76	103.45	108.23	103.07	105.28	101.2	100.85	98.81	104.35	103.56	104.85	101.81	105.69	104.03	105.2	100	103.83	111.49
Day 10	110.36	104.6	111.11	104.82	106.91	104.02	101.7	98.81	105.22	102.67	103.52	100.9	108.54	106.05	105.95	100	105.11	114.04
Day 12	114.34	107.28	113.99	107.46	109.76	106.83	101.28	98.81	106.52	105.78	107.49	104.98	110.16	108.06	107.06	101.7	105.11	115.32
Day 14	114.74	107.66	113.17	110.96	110.57	110.04	103.83	101.98	110	108.44	108.81	104.98	112.6	110.08	110.41	103.83	108.94	96.17
Single anesthesia
S FIG 1B	SEVO								INJ
	1	2	3	4	5	6	7	8	1	2	3	4	5	6	7	8
Day 0	100	100	100	100	100	100	100	100	100	100	100	100	100	100	100	100
Day 1	97.78	97.67	106.15	100.73	99.6	96.2	101.56	100	97.5	101.63	98.17	97.74	100	96.99	98.8	99.23
Day 2	96.3	98.83	106.54	98.91	100.4	96.2	100	101.09	98.57	100.81	96.34	98.11	100.79	97.74	101.2	99.62
Day 4	99.26	99.61	107.31	100.73	101.19	99.62	100.39	102.19	99.64	102.03	99.63	100.75	101.19	98.87	99.2	100.38
Day 6	99.26	98.83	108.85	100	101.19	101.14	103.52	102.92	99.29	101.63	99.63	102.26	100.79	100	101.6	100.38
Day 8	100	100.78	108.46	101.82	102.37	101.9	104.3	106.2	100	105.69	102.56	106.04	103.16	101.5	101.2	102.31
Day 10	101.48	103.5	109.23	106.55	103.95	103.8	106.25	104.74	100.71	104.88	104.76	107.17	101.98	100.75	100	102.69
Day 12	103.7	101.95	111.92	107.27	103.56	102.66	107.81	106.93	103.57	108.13	106.59	107.17	104.74	103.76	101.6	103.85
Day 14	105.19	105.06	117.31	114.18	103.95	101.9	107.81	106.93	108.93	106.1	107.33	109.81	104.74	103.76	102.8	102.69
Double anesthesia
S FIG 1C	SEVO								INJ
	1	2	3	4	5	6	7	8	1	2	3	4	5	6	7	8
Day 0	100	100	100	100	100	100	100	100	100	100	100	100	100	100	100	100
Day 1	98.6	100.36	100	100.98	100.38	98.54	101.16	102.23	100.68	98.97	100.7	100	101.02	98.95	98.66	99.61
Day 2	97.55	103.23	100.69	102.28	101.52	99.27	101.16	102.97	98.65	99.31	100	100.72	102.72	100.35	98.99	96.85
Day 4	100.7	101.79	103.13	101.95	99.24	100	101.93	106.32	102.03	97.93	102.11	101.81	104.42	104.56	98.32	101.97
Day 6	99.65	103.58	101.39	104.56	98.1	99.64	99.23	102.23	102.36	100.34	98.6	99.28	101.7	98.95	97.65	99.21
Day 7	99.3	98.92	63.19	100	100.38	98.18	100.39	102.6	101.69	98.97	101.05	100	103.4	98.6	98.66	98.82
Day 8	98.6	99.28	97.57	102.28	101.9	99.27	102.32	104.46	99.66	98.97	100.35	98.55	102.72	96.84	97.99	96.85
Day 10	99.65	98.92	98.61	103.91	101.14	100	102.32	104.83	103.38	98.97	99.65	100	102.04	99.3	97.65	98.43
Day 12	97.9	100.72	97.22	105.54	103.42	100.36	104.25	106.32	103.38	100	100.7	100	107.14	102.46	98.99	100.39
Day 14	100.35	102.87	101.04	108.79	104.94	104.38	105.79	109.67	102.7	102.07	102.46	102.17	105.1	104.21	100.67	101.57

## Sheet: S Fig 4
Priming				Single anesthesia				Double anesthesia
S FIG 2A	SEVO	CTRL		S FIG 2B	SEVO	iNJ		S FIG 2C	SEVO	INJ
Time to euthanasia	16	18		Time to euthanasia	20	15		Time to euthanasia	19	16
	16	18			22	22			20	16
	18	21			15	21			20	17
	18	18			15	17			16	28
	21	19			19	15			22	20
	19	20			28	19			22	17
	19	20			19	13			18	26
	19	19			20	20			18	18
Priming				Single anesthesia				Double anesthesia
S FIG 2D	SEVO	CTRL		S FIG 2E	SEVO	INJ		S FIG 2F	SEVO	INJ
Time to tumor	10	10		Time to tumor	12	12		Time to tumor	14	14
	10	12			12	18			14	14
	10	14			12	16			14	12
	12	10			10	12			14	14
	14	10			10	8			12	12
	10	10			20	10			12	12
	10	12			10	8			12	14
	10	10			12	12			12	14

## Sheet: S Fig 5
	single		double		primed				single		double		primed
S FIG 3A	SEVO	INJ	SEVO	INJ	SEVO	CTRL		S FIG 3B	SEVO	INJ	SEVO	INJ	SEVO	CTRL
PD-1 %	9.29	8.59	12.73	6.01	10.2	8.87		PD-L1 %	96.92	89.16	91.45	82.12	97.31	94.09
	4.96	14.08	5.23	6.87	14.64	13.31			89.92	93.67	95.21	74.41	93.22	94.93
	6.68	3.84	7.57	11.34	17.3	17.97			88.55	96.46	94.91	88.59	97.4	88.48
	10.86	6.56	7.85	8.26	13.42	15.58			96.05	88.71	79.73	93.06	96.6	96.72
	11.1	5.5	5.12	7.34	15.98	13.84			94.25	95.82	95.99	86.62	88.8	93.3
	7.83	11.08	7.72	12.66	14.39	16.97			97.34	72.63	91.77	95.38	96.3	93.15
	5.76	12.43	7.05	4.16	18.85	9.64			96.83	92.86	91.12	84.65	94.8	96.66
					16.03	13.08							92.75	91.83
	single		double		primed				single		double		primed
S FIG 3C	SEVO	INJ	SEVO	INJ	SEVO	CTRL		S FIG 3D	SEVO	INJ	SEVO	INJ	SEVO	CTRL
MFI PD-1	275	254	289	245	226	232		MFI PD-L1	15538	8569	9123	8894	11185	8665
	246	286	251	234	255	253			8909	8691	15156	5789	10392	10212
	260	245	239	281	256	255			9970	9542	13045	8332	12612	7838
	261	242	262	254	263	257			10125	8338	6986	10948	14893	9898
	277	224	228	243	266	255			11514	12012	10525	7784	7689	9530
	259	317	254	299	284	246			11642	5781	9091	13193	10559	7736
	243	284	226	228	229	216			12586	11007	7619	7329	10751	12028
					239	252							8481	8521

## Sheet: S Fig 6
Stimulation	untreated		LPS		Zymosan
S FIG 4A	SEVO	INJ	SEVO	INJ	SEVO	INJ		S FIG 4B	SEVO	INJ		S FIG 4C	SEVO	INJ		S FIG 4D	SEVO	INJ
TNF	5.66	4.79	537.81	316.53	13.66	38.95		HSC	0.33	0.39		ST-HSC	11.06	5.64		LT-HSC	88.94	94.36
	5.08	6.25	115.03	245.18	6.84	16.57			0.39	0.43			2.25	3.49			97.75	96.51
	5.08	5.08	120.8	101.28	7.14	7.29			0.48	0.44			2.29	0.85			97.71	99.15
	4.35	5.22	402.68	478.63	14.94	13.66			0.42	0.44			6.4	3.98			91.6	95.17
	3.93	4.35	158.39	390.79	8.35	12.7			0.37	0.49			11.11	7.46			87.22	91.42
	4.35	4.35	273.12	179.06	11.91	10.04			0.39	0.34			7.64	5.04			91.08	94.24
Stimulation	untreated		LPS		Zymosan
S FIG 4E	SEVO	INJ	SEVO	INJ	SEVO	INJ		S FIG 4F	SEVO	INJ		S FIG 4G	SEVO	INJ		S FIG 4H	SEVO	INJ
IL-6	8.19	1.643	236.16	279.05	901.4			CMP	2.03	0.98		MEP	13.38	9.7		GMP	12.16	13.72
	0	8.523	115.5	220.27	288.64	583.537			0.66	0.54			9.04	7.13			19.58	20.54
	3.86	5.024	157.72	153.42	298.12	200.204			0.88	0.94			9.5	12.56			15.05	15.76
	3.86	0	274.49	280.89	247.15	220.266			0.27	0.21			6.85	7.41			9.79	9.85
	0	0	190.47	291.15	162.28	436.419			0.43	0.4			9.64	9.86			11.32	11.64
	5.76	0	238.11	204.62	662.32	284.286			0.46	0.38			10.91	6.49			14.12	14.83
